# Supplementary material for: Impact of hole doping on spin transition in perovskite-type cobalt oxides
Source: Royal Society of Chemistry journal article supplement (doi:10.1039/c6dt00338a), 2016-01-01
Supplement: c6dt00338a1.pdf [file c6dt00338a1.pdf]

Electronic Supplementary Information (ESI) available for:

## Impact of hole doping on spin transition in perovskite-type cobalt oxides

Xiangli Che, Liping Li, Wanbiao Hu, and Guangshe Li\*

*Key Laboratory of Design and Assembly of Functional Nanostructures, Fujian Institute of Research on the Structure of Matter,*

*Chinese Academy of Sciences. Fuzhou, 350002, P.R.China.*

Table S1. Chemical composition of the  $\text{PrCo}_{1-x}\text{Ni}_x\text{O}_{3-\delta}$  ( $x=0\sim 0.4$ ) phases.

| x   | Cationic composition (ICP) |           | Oxygen content       |             |
|-----|----------------------------|-----------|----------------------|-------------|
|     | Co                         | Ni        | Iodometric titration | TPR         |
| 0   | 1                          | -         | 3.00±0.001           | 3.002±0.003 |
| 0.1 | 0.90±0.03                  | 0.10±0.01 | 2.94±0.02            | 2.950±0.001 |
| 0.2 | 0.80±0.02                  | 0.20±0.01 | 2.89±0.02            | 2.898±0.002 |
| 0.3 | 0.70±0.02                  | 0.30±0.01 | 2.85±0.02            | 2.849±0.002 |
| 0.4 | 0.60±0.02                  | 0.40±0.01 | 2.80±0.04            | 2.796±0.005 |

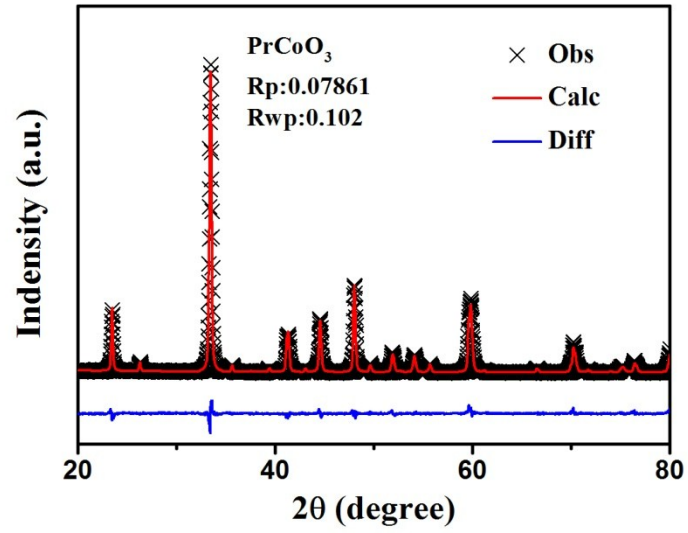

Fig. S1 Typical Rietveld structural refinements of powder X-ray diffraction data for the x=0 sample

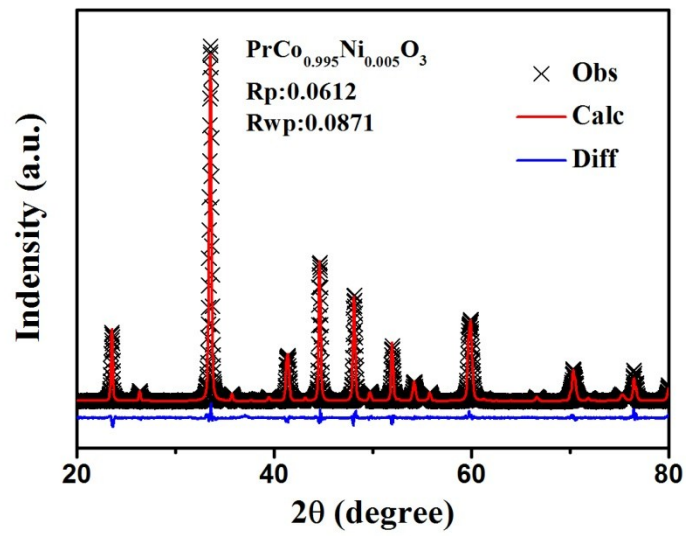

Fig. S2 Typical Rietveld structural refinements of powder X-ray diffraction data for the x=0.005 sample

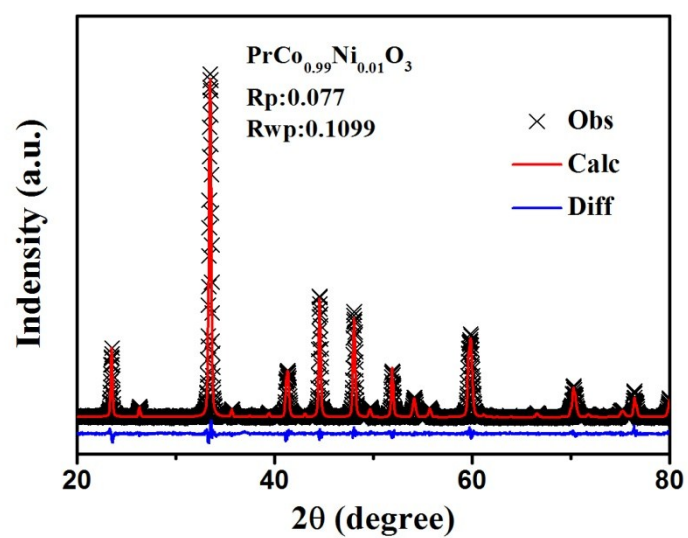

Fig. S3 Typical Rietveld structural refinements of powder X-ray diffraction data for the x=0.01 sample

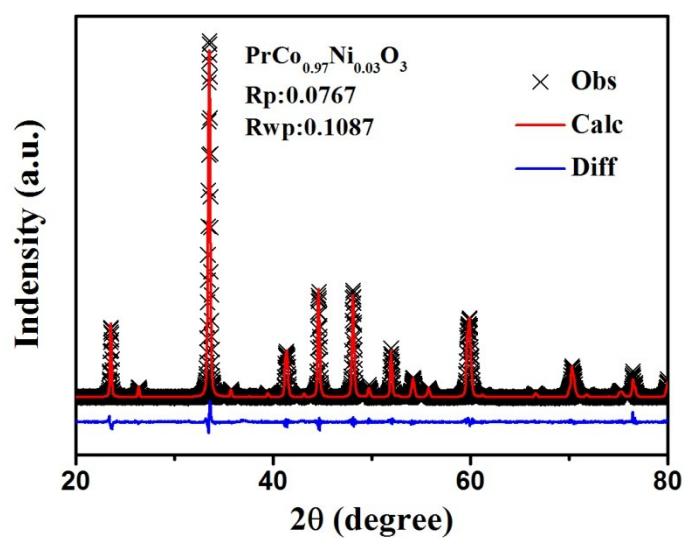

Fig. S4 Typical Rietveld structural refinements of powder X-ray diffraction data for the x=0.03 sample

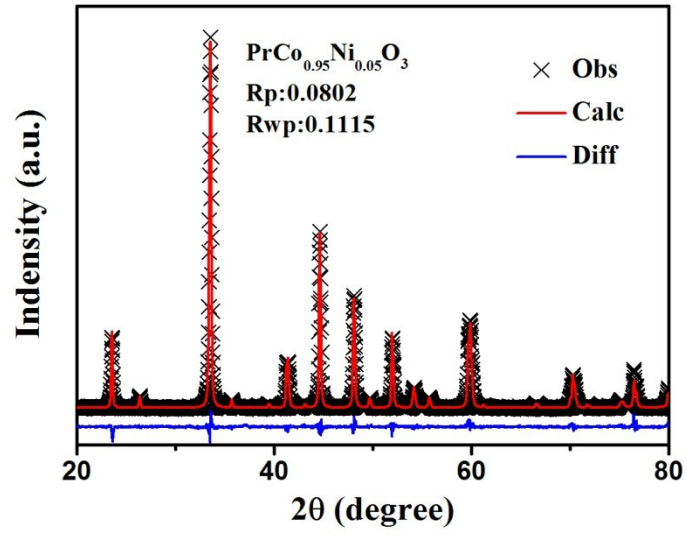

Fig. S5 Typical Rietveld structural refinements of powder X-ray diffraction data for the x=0.05 sample

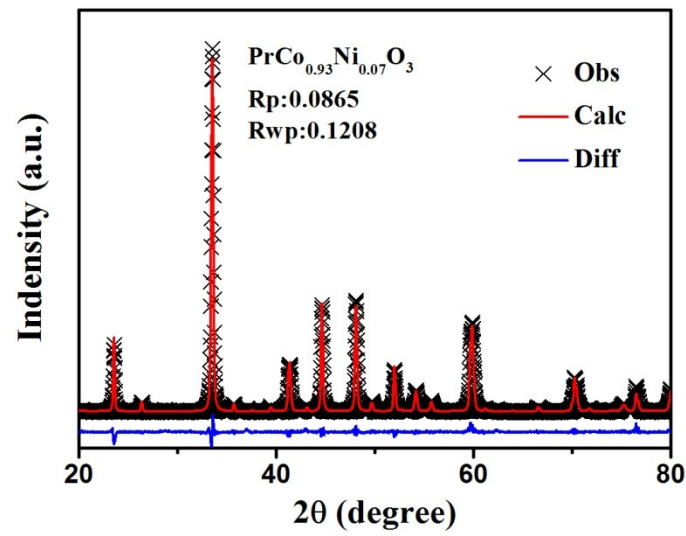

Fig. S6 Typical Rietveld structural refinements of powder X-ray diffraction data for the x=0.07 sample

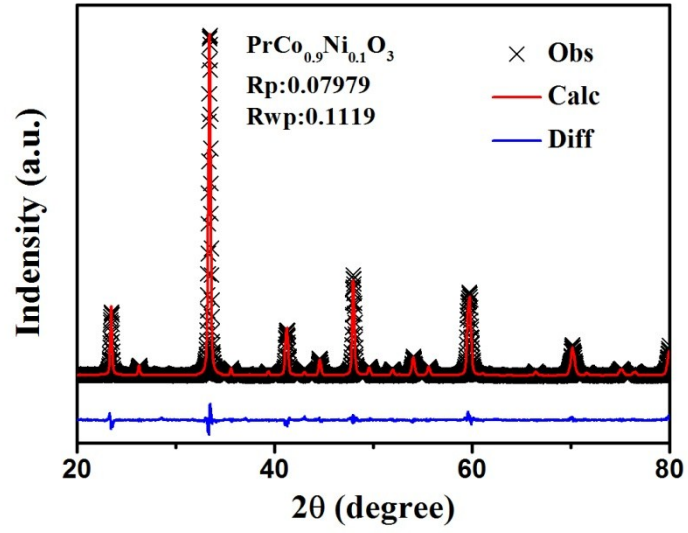

Fig. S7 Typical Rietveld structural refinements of powder X-ray diffraction data for the x=0.1 sample

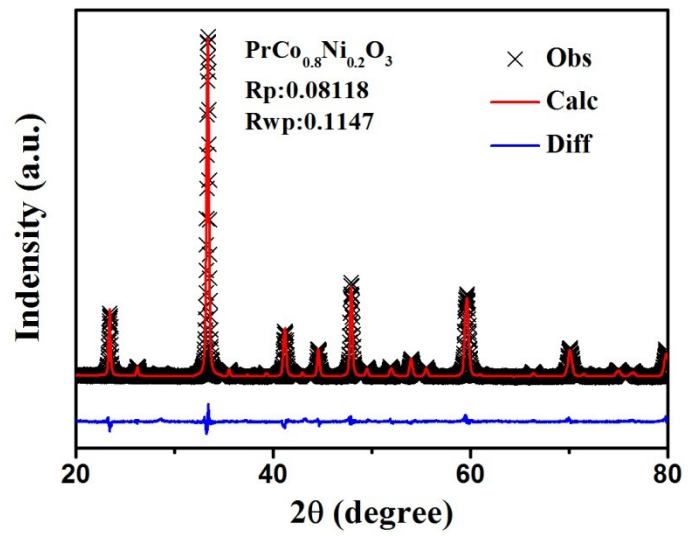

Fig. S8 Typical Rietveld structural refinements of powder X-ray diffraction data for the x=0.2 sample

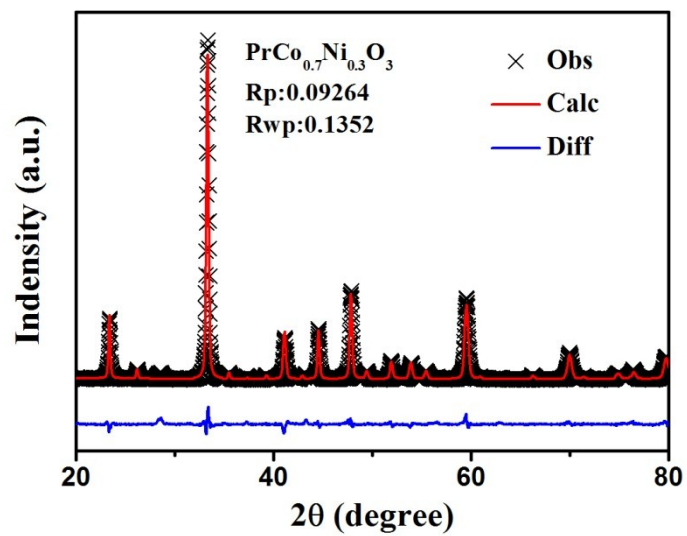

Fig. S9 Typical Rietveld structural refinements of powder X-ray diffraction data for the x=0.3 sample

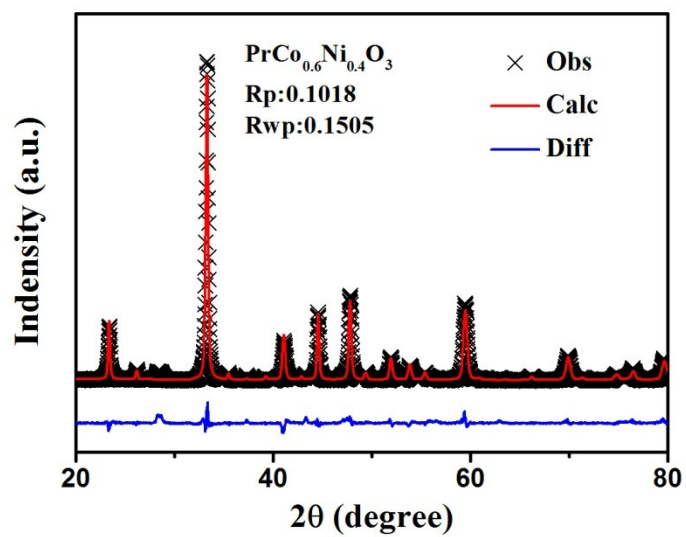

Fig. S10 Typical Rietveld structural refinements of powder X-ray diffraction data for the x=0.4 sample

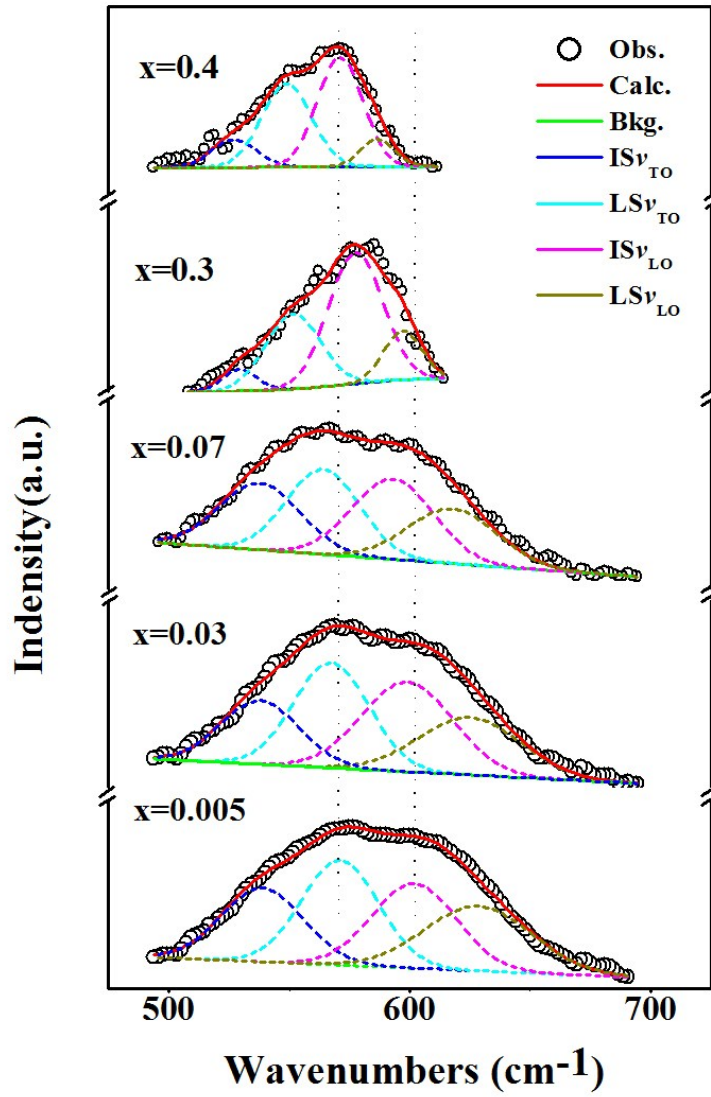

Fig. S11 IR spectra of the  $\text{PrCo}_{1-x}\text{Ni}_x\text{O}_{3.6}$  ( $x=0\sim 0.4$ ) samples at given  $x$

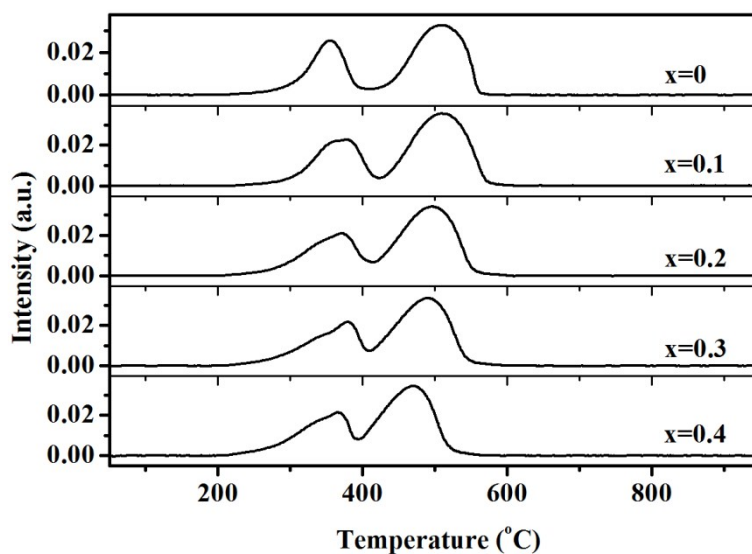

Fig. S12 TPR profiles for the  $\text{PrCo}_{1-x}\text{Ni}_x\text{O}_{3-\delta}$  ( $x=0\sim 0.4$ ) samples at given  $x$

Fig. S12 shows the TPR profiles of  $\text{PrCo}_{1-x}\text{Ni}_x\text{O}_{3-\delta}$  ( $x=0\sim 0.4$ ) samples. We can see that all samples have two reduction peaks, which correspond to two-step reduction process. The 11.9 mg of CuO was chosen as the standard sample to evaluate the hydrogen consumption of  $\text{PrCo}_{1-x}\text{Ni}_x\text{O}_{3-\delta}$  ( $x=0\sim 0.4$ ) and  $\text{Pr}_6\text{O}_{11}$  samples. Furthermore, through calculating the hydrogen consumption of  $\text{Pr}_6\text{O}_{11}$ , we can judge the  $\text{Pr}_6\text{O}_{11}$  was completely reduced to  $\text{Pr}_2\text{O}_3$  after TPR, so the  $\text{Pr}^{3+}$  is stable in this test process. This result is similar to that reported in previous literatures.<sup>1, 2</sup> So we can obtain following reduction reaction processes.

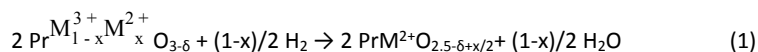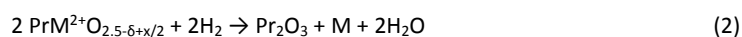

Base on the total consumption of  $\text{H}_2$  corresponds to the first step and the second step, we can obtain the oxygen content of  $\text{PrCo}_{1-x}\text{Ni}_x\text{O}_{3-\delta}$ , furthermore, the valences of the transition metal ions oxygen can be calculated combining the results of ICP.

Reference:

1. M. Futai and C. Yonghua, *React. Kinet. Catal. Lett.*, 1986, **31**, 47-54.
2. S. Royer, H. Alamdari, D. Duprez and S. Kaliaguine, *Appl. Catal., B*, 2005, **58**, 273-288.
